# Supplementary material for: Microarray analysis of the expression profile of immune-related gene in rapid recurrence early-stage lung adenocarcinoma
Source: J Cancer Res Clin Oncol. 2020 Jun 18;146(9):2299–310. doi: 10.1007/s00432-020-03287-7 (PMC7382661; doi:10.1007/s00432-020-03287-7)
Supplement: Supplementary file 1 — Supplementary file1 (XLSX 11 kb) [file 432_2020_3287_MOESM1_ESM.xlsx]

## Sheet: Sheet1
NO	Transcript Cluster ID	Fold Change_(Rapid recurrence vs. Non-rapid recurrence)	Gene Symbol
1	TC05002798.hg.1	-3.85	None
2	TC16001373.hg.1	-2.63	MSLN
3	TC11002392.hg.1	-2.45	SNORD14D
4	TC05000803.hg.1	-2.34	SCGB3A2
5	TC0Y000099.hg.1	-1.81	None
6	TC0Y000204.hg.1	-1.81	None
7	TC15001877.hg.1	-1.72	None
8	TC15001878.hg.1	-1.7	None
9	TC06001645.hg.1	-1.61	None
10	TC06000435.hg.1	-1.6	None
11	TC15000915.hg.1	-1.59	None
12	TC15000136.hg.1	-1.58	None
13	TC15000773.hg.1	-1.58	None
14	TC15000786.hg.1	-1.58	None
15	TC15001096.hg.1	-1.58	None
16	TC15001160.hg.1	-1.58	None
17	TC15001745.hg.1	-1.58	None
18	TC15001776.hg.1	-1.58	None
19	TC19000304.hg.1	-1.58	None
20	TC03001797.hg.1	-1.57	RNA5SP140
21	TC12001193.hg.1	-1.57	None
22	TC06002494.hg.1	-1.56	None
23	TC06001620.hg.1	-1.56	None
24	TC15002743.hg.1	-1.53	PRKXP1
25	TC15001625.hg.1	-1.52	None
26	TC15001677.hg.1	-1.52	None
27	TC15001844.hg.1	-1.52	None
28	TC18000271.hg.1	-1.52	DUX4
29	TC04002853.hg.1	-1.52	None
30	TC17002650.hg.1	-1.52	None
31	TC12000424.hg.1	1.51	KRT18
32	TC04000083.hg.1	1.52	AFAP1-AS1
33	TC01000990.hg.1	1.53	CAPZA1
34	TC02001255.hg.1	1.54	None
35	TC6_cox_hap2000194.hg.1	1.54	HLA-DRB6
36	TC01004100.hg.1	1.55	None
37	TC05002434.hg.1	1.55	MAP1B
38	TC20000893.hg.1	1.56	PLTP
39	TC16000559.hg.1	1.56	CDH1
40	TC07002809.hg.1	1.56	None
41	TC01003015.hg.1	1.61	CSDE1
42	TC14001636.hg.1	1.61	ARHGAP5
43	TC02004161.hg.1	1.61	EIF2AK2
44	TC13000320.hg.1	1.61	MIR622
45	TC07002860.hg.1	1.62	None
46	TC02001267.hg.1	1.62	AC093850.2
47	TC10000258.hg.1	1.65	RNU6-1118P
48	TC0X000788.hg.1	1.67	MIR1184-1
49	TC0X001548.hg.1	1.67	MIR1184-1
50	TC0X001553.hg.1	1.67	MIR1184-1
51	TC10000475.hg.1	1.73	PLAU
52	TC11000572.hg.1	1.74	RARRES3
53	TC04000031.hg.1	1.76	SCARNA22
54	TC01003169.hg.1	1.85	None
55	TC16001359.hg.1	1.86	None
56	TC16001720.hg.1	1.88	TUBB3
57	TC01004629.hg.1	1.89	CAPZA1
58	TC07001168.hg.1	1.89	LOC101927630
59	TC03002078.hg.1	1.92	LIPH
60	TC01002412.hg.1	1.94	IFI6
61	TC06001427.hg.1	1.96	HIST1H3I
62	TC19002475.hg.1	1.96	SPINT2
63	TC01003185.hg.1	2.03	None
64	TC07001167.hg.1	2.04	AC019117.2
65	TC03002146.hg.1	2.06	APOD
66	TC04001887.hg.1	2.12	AFAP1-AS1
67	TC14000691.hg.1	2.14	SNORD114-14
68	TC03001604.hg.1	2.14	DCBLD2
69	TC01003084.hg.1	2.25	None
70	TC14000671.hg.1	2.3	SNORD113-6
71	TC03003002.hg.1	2.37	DCBLD2
72	TC05000736.hg.1	4.17	VTRNA1-3
