# Supplementary material for: Microarray analysis of the expression profile of immune-related gene in rapid recurrence early-stage lung adenocarcinoma
Source: J Cancer Res Clin Oncol. 2020 Jun 18;146(9):2299–310. doi: 10.1007/s00432-020-03287-7 (PMC7382661; doi:10.1007/s00432-020-03287-7)
Supplement: Supplementary file 2 — Supplementary file2 (XLSX 41 kb) [file 432_2020_3287_MOESM2_ESM.xlsx]

## Sheet: Sheet1
NO	Gene Symbol	Fold Change_(Rapid recurrence vs. Non-rapid recurrence)
1	XIST	-30.4
2	CEACAM5	-21.27
3	S100A9	-11.77
4	IGJ	-10.31
5	GDF15	-9.42
6	SPINK1	-9.13
7	PTGS2	-9.02
8	PLAT	-8.96
9	IGLV7-43	-7.93
10	IGLV7-46	-7.89
11	CXCL17	-7.73
12	CEACAM6	-7.68
13	CLIC6	-7.16
14	DHRS9	-6.53
15	IGKV2D-29	-6.34
16	IGKV2D-28	-6.32
17	FLJ13744	-6.26
18	IGKV2-29	-6.09
19	IGKV2-28	-6.06
20	HLA-DRB4	-5.78
21	IGKC	-5.52
22	PIGR	-5.15
23	G6PD	-5.05
24	AKR1C2	-4.97
25	IGKV2D-26	-4.91
26	IGHV3-15	-4.62
27	IGHV3-9	-4.49
28	SLC34A2	-4.42
29	IGHV3-7	-4.37
30	IGHM	-4.33
31	IGHV1-8	-4.33
32	POF1B	-4.26
33	IGLV3-27	-4.25
34	IGHV4-28	-4.04
35	LOC642131	-4.04
36	LINC00342	-4.02
37	LOC100996862	-3.99
38	MAP1B	-3.94
39	LCN2	-3.92
40	PLA2G4A	-3.92
41	IGHV3-73	-3.91
42	IGKV1-27	-3.91
43	AQP7P1	-3.85
44	AQP7P3	-3.84
45	CCL19	-3.84
46	CTSH	-3.73
47	TNFAIP3	-3.7
48	IGHV4-31	-3.68
49	TMC5	-3.63
50	SOX2	-3.61
51	IGHA1	-3.6
52	EPC1	-3.58
53	IGHV2-5	-3.58
54	IGHV3-33	-3.58
55	MUC5B	-3.56
56	IGKV3D-7	-3.55
57	IGKV1-8	-3.47
58	IGKV2D-24	-3.46
59	VTRNA2-1	-3.46
60	SAMD12	-3.45
61	MGP	-3.44
62	IGHV3-30	-3.42
63	LOC100506076	-3.42
64	LOC100506123	-3.42
65	IGKV3D-15	-3.32
66	IGHV3-49	-3.28
67	CCT6A	-3.27
68	CCL20	-3.25
69	IGKV1D-27	-3.25
70	IL1B	-3.23
71	IGHV3-23	-3.22
72	IGKV2-24	-3.2
73	LINC00350	-3.19
74	GBAS	-3.18
75	SELL	-3.18
76	IGKV1-9	-3.17
77	SNORD115-10	-3.14
78	SNORD115-11	-3.14
79	SNORD115-12	-3.14
80	SNORD115-29	-3.14
81	SNORD115-36	-3.14
82	SNORD115-43	-3.14
83	SNORD115-5	-3.14
84	SNORD115-9	-3.14
85	ANKRD36C	-3.13
86	IGKV3-11	-3.13
87	IGKV1-6	-3.09
88	ST6GALNAC1	-3.08
89	CXCL6	-3.05
90	IGHJ5	-3.05
91	VOPP1	-3.04
92	IGHV3-48	-3.02
93	CLDN1	-3.01
94	EFNA5	-3
95	IGHV3-72	-3
96	SNORD115-22	-3
97	IGKV4-1	-2.99
98	IGKV1D-16	-2.95
99	IGHV4-61	-2.93
100	SCGB3A2	-2.93
101	IGKV1D-37	-2.92
102	SNORD75	-2.92
103	IGHV3-38	-2.91
104	IGHV3-66	-2.9
105	SLPI	-2.9
106	SEL1L3	-2.87
107	FDPSP2	-2.86
108	IGHV3-53	-2.84
109	CAPN8	-2.8
110	IGHV3OR16-10	-2.79
111	SPINT2	-2.79
112	ANKRD36	-2.78
113	ANKRD36BP2	-2.78
114	KIAA1551	-2.77
115	ANKRD36B	-2.76
116	IGKV1-5	-2.76
117	RDH10	-2.76
118	PRSS8	-2.75
119	TSPAN1	-2.72
120	IGKV1-17	-2.71
121	SNORD63	-2.71
122	IGKV@	-2.7
123	IGKV3D-20	-2.7
124	IGLV2-18	-2.7
125	TP53INP1	-2.7
126	LIF	-2.69
127	IGLV3-25	-2.68
128	SEC61G	-2.67
129	IGKV3-7	-2.62
130	IGLV3-1	-2.6
131	KRT7	-2.6
132	DHCR24	-2.59
133	MUC20	-2.59
134	SLC12A7	-2.59
135	PRLR	-2.56
136	C4B	-2.55
137	IGHV3-21	-2.55
138	LIPH	-2.55
139	VTRNA1-2	-2.55
140	EHF	-2.54
141	EMB	-2.54
142	LOC100288562	-2.53
143	REXO1L1	-2.53
144	TSPAN13	-2.51
145	GPR183	-2.48
146	IGHJ1	-2.48
147	SRD5A3	-2.46
148	TRIM44	-2.44
149	HTR3A	-2.43
150	IGHV1-45	-2.42
151	CXCL5	-2.41
152	COMMD9	-2.4
153	PRKAR1A	-2.4
154	REXO1L2P	-2.4
155	IGKV1-37	-2.39
156	PELI2	-2.39
157	IGKV3D-11	-2.38
158	CD79A	-2.36
159	TMPRSS4	-2.36
160	IGKJ1	-2.35
161	IGKJ2	-2.35
162	IGKJ3	-2.35
163	IGKJ4	-2.35
164	IGKJ5	-2.35
165	IGKV1-12	-2.35
166	IGKV1-16	-2.35
167	IGKV1-33	-2.35
168	IGKV1-39	-2.35
169	IGKV2-30	-2.35
170	IGKV3-15	-2.35
171	IGKV3-20	-2.35
172	IGHV3-35	-2.34
173	IGLC7	-2.34
174	CHCHD2	-2.33
175	ERBB3	-2.33
176	F5	-2.33
177	PLA2G1B	-2.33
178	ASS1	-2.32
179	IGHV3-74	-2.32
180	PGAM2	-2.31
181	CST2	-2.29
182	IGKV1D-39	-2.29
183	IGKV1D-42	-2.29
184	SNORD1B	-2.29
185	SBK1	-2.27
186	CP	-2.26
187	IGKV1D-12	-2.26
188	NAIP	-2.26
189	IGHV3-11	-2.25
190	LOC100293211	-2.25
191	PPM1H	-2.25
192	TXN	-2.25
193	IGHV3OR16-9	-2.24
194	MIR4635	-2.24
195	ATP1B1	-2.23
196	CHCHD2P6	-2.23
197	IGHV1-3	-2.23
198	A2M	-2.21
199	CD24	-2.21
200	ELF3	-2.21
201	MACC1	-2.21
202	LOC100996643	-2.2
203	LOC286297	-2.2
204	MBOAT2	-2.2
205	ABCC3	-2.19
206	KIAA1244	-2.19
207	SNORD115-44	-2.19
208	ID1	-2.18
209	SNORD85	-2.18
210	FGD6	-2.16
211	IGLV2-33	-2.16
212	SUMF2	-2.16
213	POPDC3	-2.15
214	IGHV6-1	-2.14
215	AMY2A	-2.13
216	KCNA3	-2.13
217	RNU7-11P	-2.12
218	BCL2A1	-2.11
219	EGFR	-2.11
220	ITGB8	-2.11
221	TSPAN3	-2.11
222	IGHV3-64	-2.09
223	LOC100133920	-2.09
224	PGC	-2.09
225	KRT6A	-2.08
226	PRSS12	-2.08
227	SCARNA4	-2.08
228	SLCO4A1	-2.08
229	SNORD119	-2.08
230	MIR4257	-2.07
231	TMEM245	-2.07
232	DMBT1	-2.06
233	IGHG1	-2.06
234	KIAA0125	-2.06
235	LINC00221	-2.06
236	LINC00226	-2.06
237	SKAP2	-2.06
238	SNORD116-15	-2.06
239	ZCWPW2	-2.06
240	FUT2	-2.05
241	MMP7	-2.05
242	HAMP	-2.04
243	IGHV1-18	-2.04
244	ADAM6	-2.03
245	FAM43A	-2.03
246	LOC100093631	-2.03
247	RNU5D-1	-2.03
248	SCFV	-2.03
249	ABCA13	-2.02
250	AKR1C3	-2.02
251	C7	-2.02
252	IGKV1D-33	-2.02
253	MUC21	-2.02
254	RASEF	-2.02
255	SNORA23	-2.02
256	SNORD61	-2.02
257	TCN1	-2.02
258	EIF2S3	-2.01
259	LY75	-2.01
260	SNORD9	-2.01
261	HMGB3	2.01
262	SCARNA6	2.01
263	DSG2	2.02
264	MARVELD1	2.02
265	ANLN	2.03
266	ETV4	2.03
267	FNDC1	2.03
268	CCNG2	2.04
269	MCAM	2.05
270	NID1	2.05
271	SYT7	2.05
272	SNCG	2.06
273	FAM3C	2.07
274	IL17RB	2.07
275	MIR3689F	2.07
276	MMP14	2.07
277	NT5E	2.07
278	SEMA3A	2.07
279	COL18A1	2.08
280	FAT1	2.08
281	HIST1H3B	2.08
282	HIST1H3D	2.08
283	HIST1H3F	2.08
284	HIST1H3H	2.08
285	HIST1H3J	2.08
286	PON3	2.08
287	IFI6	2.09
288	NETO2	2.1
289	TNC	2.1
290	ANXA1	2.11
291	HIST1H3A	2.11
292	HIST1H3C	2.11
293	HIST1H3E	2.11
294	HIST1H3G	2.11
295	HIST1H3I	2.11
296	FGFBP1	2.12
297	MAFIP	2.12
298	TEKT4P2	2.12
299	ASPM	2.13
300	EDNRA	2.13
301	KDELC2	2.13
302	MIR26B	2.13
303	SFTPA1	2.13
304	CX3CL1	2.15
305	DRAP1	2.15
306	PDE4A	2.17
307	COL6A1	2.18
308	H1F0	2.18
309	MBIP	2.18
310	HMGA2	2.19
311	MT1F	2.19
312	THY1	2.19
313	AURKB	2.22
314	SPRR1B	2.23
315	ASPH	2.25
316	BACE1	2.25
317	KCNQ5-AS2	2.26
318	TDRD12	2.26
319	CDC20	2.27
320	GJB2	2.27
321	OAS2	2.27
322	MYBPH	2.29
323	ISM1	2.3
324	LGALS1	2.3
325	RHOU	2.32
326	EDN2	2.34
327	LOC100233156	2.34
328	LOC389834	2.34
329	DMKN	2.35
330	CLDN10-AS1	2.37
331	S100A4	2.37
332	HIST1H2BM	2.38
333	TCEA3	2.39
334	COL11A1	2.4
335	LRRC15	2.41
336	PPBP	2.42
337	VSIG1	2.44
338	HTR1D	2.48
339	HSPB6	2.49
340	BST2	2.5
341	MUC4	2.5
342	TBX3	2.5
343	SFTPA2	2.51
344	PHC2	2.55
345	PPP1R14BP3	2.56
346	KCNQ5-IT1	2.58
347	TMPRSS11E	2.6
348	TIMP3	2.62
349	MT1H	2.64
350	HIST1H4B	2.65
351	HIST1H4D	2.65
352	HIST1H4H	2.65
353	HIST1H4J	2.65
354	HIST1H4L	2.65
355	HIST2H4B	2.65
356	HIST4H4	2.65
357	MKI67	2.65
358	TRNP1	2.65
359	DSC2	2.68
360	DPP4	2.7
361	HIST1H4A	2.71
362	HIST1H4C	2.71
363	HIST1H4E	2.71
364	HIST1H4F	2.71
365	HIST1H4I	2.71
366	HIST1H4K	2.71
367	HIST2H4A	2.71
368	IFI27	2.71
369	MT1JP	2.71
370	IGF2BP1	2.73
371	RUNX1-IT1	2.75
372	RPS4Y1	2.77
373	HIST1H2AB	2.8
374	HIST1H2AE	2.8
375	CDH3	2.85
376	MMP12	2.87
377	ERRFI1	2.88
378	CHST3	2.9
379	CCL18	2.91
380	MUC16	2.97
381	CHI3L1	3.02
382	MT1M	3.02
383	NRK	3.07
384	CYP24A1	3.12
385	MT1E	3.14
386	MMP9	3.18
387	SPRR2D	3.19
388	SPTB	3.27
389	EEF1A2	3.33
390	MT1G	3.34
391	MX1	3.34
392	UBE2C	3.35
393	HIST1H2BC	3.4
394	HIST1H2BE	3.4
395	HIST1H2BF	3.4
396	HIST1H2BG	3.4
397	HIST1H2BI	3.4
398	VGF	3.45
399	FLNC	3.49
400	XAGE1B	3.71
401	XAGE1D	3.71
402	EREG	3.76
403	AQP1	3.98
404	XAGE1A	4.06
405	XAGE1C	4.06
406	AREG	4.09
407	AREGB	4.09
408	COL12A1	5.26
409	MMP1	6.19
410	SNORD14D	6.39
411	MT1L	6.71
412	DSP	7.26
413	MMP13	7.28
414	HLA-DQA1	7.3
415	MT1A	7.64
416	XAGE1E	13.96

## Sheet: Sheet2
-30.4	30.4
-21.27	21.27
-11.77	11.77
-10.31	10.31
-9.42	9.42
-9.13	9.13
-9.02	9.02
-8.96	8.96
-7.93	7.93
-7.89	7.89
	XAGE1E	MT1A	HLA-DQA1	MMP13	DSP	MT1L	SNORD14D	MMP1	COL12A1	AREG	AREGB	XAGE1A	XAGE1C	AQP1	EREG	XAGE1B	XAGE1D	FLNC	VGF	HIST1H2BC	HIST1H2BE	HIST1H2BF	HIST1H2BG	HIST1H2BI	UBE2C	MT1G	MX1	EEF1A2	SPTB	SPRR2D	MMP9	MT1E	CYP24A1	NRK	CHI3L1	MT1M	MUC16	CCL18	CHST3	ERRFI1	MMP12	CDH3	HIST1H2AB	HIST1H2AE	RPS4Y1	RUNX1-IT1	IGF2BP1	HIST1H4A	HIST1H4C
	XAGE1E	MT1A	HLA-DQA1	MMP13	DSP	MT1L	SNORD14D	MMP1	COL12A1	AREG	AREGB	XAGE1A	XAGE1C	AQP1	EREG	XAGE1B	XAGE1D	FLNC	VGF	HIST1H2BC	HIST1H2BE	HIST1H2BF	HIST1H2BG	HIST1H2BI	UBE2C	MT1G	MX1	EEF1A2	SPTB	SPRR2D	MMP9	MT1E	CYP24A1	NRK	CHI3L1	MT1M	MUC16	CCL18	CHST3	ERRFI1	MMP12	CDH3	HIST1H2AB	HIST1H2AE	RPS4Y1	RUNX1-IT1	IGF2BP1	HIST1H4A	HIST1H4C
	13.96	7.64	7.3	7.28	7.26	6.71	6.39	6.19	5.26	4.09	4.09	4.06	4.06	3.98	3.76	3.71	3.71	3.49	3.45	3.4	3.4	3.4	3.4	3.4	3.35	3.34	3.34	3.33	3.27	3.19	3.18	3.14	3.12	3.07	3.02	3.02	2.97	2.91	2.9	2.88	2.87	2.85	2.8	2.8	2.77	2.75	2.73	2.71	2.71
	1	1	1	1	1	1	1	1	1	1	1	1	1	1	1	1	1	1	1	1	1	1	1	1	1	1	1	1	1	1	1	1	1	1	1	1	1	1	1	1	1	1	1	1	1	1	1	1	1
	EIF2S3	LY75	SNORD9	ABCA13	AKR1C3	C7	IGKV1D-33	MUC21	RASEF	SNORA23	SNORD61	TCN1	ADAM6	FAM43A	LOC100093631	RNU5D-1	SCFV	HAMP	IGHV1-18	FUT2	MMP7	DMBT1	IGHG1	KIAA0125	LINC00221	LINC00226	SKAP2	SNORD116-15	ZCWPW2	MIR4257	TMEM245	KRT6A	PRSS12	SCARNA4	SLCO4A1	SNORD119	IGHV3-64	LOC100133920	PGC	BCL2A1	EGFR	ITGB8	TSPAN3	RNU7-11P	AMY2A	KCNA3	IGHV6-1	POPDC3	FGD6
	-2.01	-2.01	-2.01	-2.02	-2.02	-2.02	-2.02	-2.02	-2.02	-2.02	-2.02	-2.02	-2.03	-2.03	-2.03	-2.03	-2.03	-2.04	-2.04	-2.05	-2.05	-2.06	-2.06	-2.06	-2.06	-2.06	-2.06	-2.06	-2.06	-2.07	-2.07	-2.08	-2.08	-2.08	-2.08	-2.08	-2.09	-2.09	-2.09	-2.11	-2.11	-2.11	-2.11	-2.12	-2.13	-2.13	-2.14	-2.15	-2.16
	1	1	1	1	1	1	1	1	1	1	1	1	1	1	1	1	1	1	1	1	1	1	1	1	1	1	1	1	1	1	1	1	1	1	1	1	1	1	1	1	1	1	1	1	1	1	1	1	1
[truncated: 211 more columns]

## Sheet: 一一对应
Fold Change_(1-yr vs. 3-yr)	Gene Symbol		Gene Symbol	Fold Change_(1-yr vs. 3-yr)
-2.21	A2M		A2M	-2.21
-2.02	ABCA13		ABCA13	-2.02
-2.19	ABCC3		ABCC3	-2.19
-2.03	IGHG1; IGK; SKAP2; ADAM6; IGHM; IGHV3-48; EPC1; SCFV		ADAM6	-2.03
-4.97	AKR1C2; LOC101930400		AKR1C2	-4.97
-2.02	AKR1C3		AKR1C3	-2.02
-2.13	AMY2A		AMY2A	-2.13
-2.78	ANKRD36; ANKRD36C; ANKRD36B		ANKRD36	-2.78
-2.76	ANKRD36B; ANKRD36		ANKRD36B	-2.76
-2.78	ANKRD36BP2		ANKRD36BP2	-2.78
-3.13	ANKRD36C		ANKRD36C	-3.13
2.03	ANLN		ANLN	2.03
2.11	ANXA1		ANXA1	2.11
3.98	AQP1		AQP1	3.98
-3.85	AQP7P1		AQP7P1	-3.85
-3.84	AQP7P3		AQP7P3	-3.84
4.09	AREG; AREGB		AREG	4.09
4.09	AREG; AREGB		AREGB	4.09
2.25	ASPH		ASPH	2.25
2.13	ASPM		ASPM	2.13
-2.32	ASS1		ASS1	-2.32
-2.23	ATP1B1		ATP1B1	-2.23
2.22	AURKB		AURKB	2.22
2.25	BACE1		BACE1	2.25
-2.11	BCL2A1		BCL2A1	-2.11
2.5	BST2		BST2	2.5
-2.55	C4B		C4B	-2.55
-2.02	C7		C7	-2.02
-2.8	CAPN8		CAPN8	-2.8
2.91	CCL18; LOC101060271		CCL18	2.91
-3.84	CCL19		CCL19	-3.84
-3.25	CCL20		CCL20	-3.25
2.04	CCNG2		CCNG2	2.04
-3.27	CCT6A		CCT6A	-3.27
-2.21	CD24		CD24	-2.21
-2.36	CD79A		CD79A	-2.36
2.27	CDC20		CDC20	2.27
2.85	CDH3		CDH3	2.85
-21.27	CEACAM5		CEACAM5	-21.27
-7.68	CEACAM6		CEACAM6	-7.68
-2.33	CHCHD2		CHCHD2	-2.33
-2.23	CHCHD2P6		CHCHD2P6	-2.23
3.02	CHI3L1		CHI3L1	3.02
2.9	CHST3		CHST3	2.9
-3.01	CLDN1		CLDN1	-3.01
2.37	CLDN10-AS1		CLDN10-AS1	2.37
-7.16	CLIC6		CLIC6	-7.16
2.4	COL11A1		COL11A1	2.4
5.26	COL12A1		COL12A1	5.26
2.08	COL18A1		COL18A1	2.08
2.18	COL6A1		COL6A1	2.18
-2.4	COMMD9		COMMD9	-2.4
-2.26	CP		CP	-2.26
-2.29	CST2		CST2	-2.29
-3.73	CTSH		CTSH	-3.73
2.15	CX3CL1		CX3CL1	2.15
-7.73	CXCL17		CXCL17	-7.73
-2.41	CXCL5		CXCL5	-2.41
-3.05	CXCL6		CXCL6	-3.05
3.12	CYP24A1		CYP24A1	3.12
-2.59	DHCR24		DHCR24	-2.59
-6.53	DHRS9		DHRS9	-6.53
-2.06	DMBT1		DMBT1	-2.06
2.35	DMKN		DMKN	2.35
2.7	DPP4		DPP4	2.7
2.15	DRAP1		DRAP1	2.15
2.68	DSC2		DSC2	2.68
2.02	DSG2		DSG2	2.02
7.26	DSP		DSP	7.26
2.34	EDN2		EDN2	2.34
2.13	EDNRA		EDNRA	2.13
3.33	EEF1A2		EEF1A2	3.33
-3	EFNA5		EFNA5	-3
-2.11	EGFR		EGFR	-2.11
-2.54	EHF		EHF	-2.54
-2.01	EIF2S3		EIF2S3	-2.01
-2.21	ELF3		ELF3	-2.21
-2.54	EMB		EMB	-2.54
-3.58	EPC1; IGHV3-33		EPC1	-3.58
-2.33	ERBB3		ERBB3	-2.33
3.76	EREG		EREG	3.76
2.88	ERRFI1		ERRFI1	2.88
2.03	ETV4		ETV4	2.03
-2.33	F5		F5	-2.33
2.07	FAM3C		FAM3C	2.07
-2.03	FAM43A		FAM43A	-2.03
2.08	FAT1		FAT1	2.08
-2.86	FDPSP2		FDPSP2	-2.86
-2.16	FGD6		FGD6	-2.16
2.12	FGFBP1		FGFBP1	2.12
-6.26	FLJ13744		FLJ13744	-6.26
3.49	FLNC		FLNC	3.49
2.03	FNDC1		FNDC1	2.03
-2.05	FUT2		FUT2	-2.05
-5.05	G6PD		G6PD	-5.05
-3.18	GBAS		GBAS	-3.18
-9.42	GDF15		GDF15	-9.42
2.27	GJB2		GJB2	2.27
-2.48	GPR183		GPR183	-2.48
2.18	H1F0		H1F0	2.18
-2.04	HAMP		HAMP	-2.04
2.8	HIST1H2AE; HIST1H2AB		HIST1H2AB	2.8
2.8	HIST1H2AE; HIST1H2AB		HIST1H2AE	2.8
3.4	HIST1H2BG; HIST1H2BF; HIST1H2BE; HIST1H2BI; HIST1H2BC		HIST1H2BC	3.4
3.4	HIST1H2BG; HIST1H2BF; HIST1H2BE; HIST1H2BI; HIST1H2BC		HIST1H2BE	3.4
3.4	HIST1H2BG; HIST1H2BF; HIST1H2BE; HIST1H2BI; HIST1H2BC		HIST1H2BF	3.4
3.4	HIST1H2BG; HIST1H2BF; HIST1H2BE; HIST1H2BI; HIST1H2BC		HIST1H2BG	3.4
3.4	HIST1H2BG; HIST1H2BF; HIST1H2BE; HIST1H2BI; HIST1H2BC		HIST1H2BI	3.4
2.38	HIST1H2BM		HIST1H2BM	2.38
2.11	HIST1H3F; HIST1H3A; HIST1H3D; HIST1H3C; HIST1H3E; HIST1H3I; HIST1H3G; HIST1H3J; HIST1H3H; HIST1H3B		HIST1H3A	2.11
2.08	HIST1H3I; HIST1H3A; HIST1H3D; HIST1H3C; HIST1H3E; HIST1H3G; HIST1H3J; HIST1H3H; HIST1H3B; HIST1H3F		HIST1H3B	2.08
2.11	HIST1H3F; HIST1H3A; HIST1H3D; HIST1H3C; HIST1H3E; HIST1H3I; HIST1H3G; HIST1H3J; HIST1H3H; HIST1H3B		HIST1H3C	2.11
2.08	HIST1H3I; HIST1H3A; HIST1H3D; HIST1H3C; HIST1H3E; HIST1H3G; HIST1H3J; HIST1H3H; HIST1H3B; HIST1H3F		HIST1H3D	2.08
2.11	HIST1H3F; HIST1H3A; HIST1H3D; HIST1H3C; HIST1H3E; HIST1H3I; HIST1H3G; HIST1H3J; HIST1H3H; HIST1H3B		HIST1H3E	2.11
2.08	HIST1H3I; HIST1H3A; HIST1H3D; HIST1H3C; HIST1H3E; HIST1H3G; HIST1H3J; HIST1H3H; HIST1H3B; HIST1H3F		HIST1H3F	2.08
2.11	HIST1H3F; HIST1H3A; HIST1H3D; HIST1H3C; HIST1H3E; HIST1H3I; HIST1H3G; HIST1H3J; HIST1H3H; HIST1H3B		HIST1H3G	2.11
2.08	HIST1H3I; HIST1H3A; HIST1H3D; HIST1H3C; HIST1H3E; HIST1H3G; HIST1H3J; HIST1H3H; HIST1H3B; HIST1H3F		HIST1H3H	2.08
2.11	HIST1H3F; HIST1H3A; HIST1H3D; HIST1H3C; HIST1H3E; HIST1H3I; HIST1H3G; HIST1H3J; HIST1H3H; HIST1H3B		HIST1H3I	2.11
2.08	HIST1H3I; HIST1H3A; HIST1H3D; HIST1H3C; HIST1H3E; HIST1H3G; HIST1H3J; HIST1H3H; HIST1H3B; HIST1H3F		HIST1H3J	2.08
2.71	HIST1H4D; HIST1H4I; HIST1H4A; HIST1H4F; HIST1H4K; HIST1H4J; HIST1H4C; HIST1H4H; HIST1H4B; HIST1H4E; HIST1H4L; HIST2H4A; HIST4H4; HIST2H4B		HIST1H4A	2.71
2.65	HIST1H4E; HIST1H4I; HIST1H4A; HIST1H4D; HIST1H4F; HIST1H4K; HIST1H4J; HIST1H4C; HIST1H4H; HIST1H4B; HIST1H4L; HIST2H4A; HIST4H4; HIST2H4B		HIST1H4B	2.65
2.71	HIST1H4D; HIST1H4I; HIST1H4A; HIST1H4F; HIST1H4K; HIST1H4J; HIST1H4C; HIST1H4H; HIST1H4B; HIST1H4E; HIST1H4L; HIST2H4A; HIST4H4; HIST2H4B		HIST1H4C	2.71
2.65	HIST1H4E; HIST1H4I; HIST1H4A; HIST1H4D; HIST1H4F; HIST1H4K; HIST1H4J; HIST1H4C; HIST1H4H; HIST1H4B; HIST1H4L; HIST2H4A; HIST4H4; HIST2H4B		HIST1H4D	2.65
2.71	HIST1H4E		HIST1H4E	2.71
2.71	HIST1H4D; HIST1H4I; HIST1H4A; HIST1H4F; HIST1H4K; HIST1H4J; HIST1H4C; HIST1H4H; HIST1H4B; HIST1H4E; HIST1H4L; HIST2H4A; HIST4H4; HIST2H4B		HIST1H4F	2.71
2.65	HIST1H4E; HIST1H4I; HIST1H4A; HIST1H4D; HIST1H4F; HIST1H4K; HIST1H4J; HIST1H4C; HIST1H4H; HIST1H4B; HIST1H4L; HIST2H4A; HIST4H4; HIST2H4B		HIST1H4H	2.65
2.71	HIST1H4D; HIST1H4I; HIST1H4A; HIST1H4F; HIST1H4K; HIST1H4J; HIST1H4C; HIST1H4H; HIST1H4B; HIST1H4E; HIST1H4L; HIST2H4A; HIST4H4; HIST2H4B		HIST1H4I	2.71
2.65	HIST1H4E; HIST1H4I; HIST1H4A; HIST1H4D; HIST1H4F; HIST1H4K; HIST1H4J; HIST1H4C; HIST1H4H; HIST1H4B; HIST1H4L; HIST2H4A; HIST4H4; HIST2H4B		HIST1H4J	2.65
2.71	HIST1H4D; HIST1H4I; HIST1H4A; HIST1H4F; HIST1H4K; HIST1H4J; HIST1H4C; HIST1H4H; HIST1H4B; HIST1H4E; HIST1H4L; HIST2H4A; HIST4H4; HIST2H4B		HIST1H4K	2.71
2.65	HIST1H4E; HIST1H4I; HIST1H4A; HIST1H4D; HIST1H4F; HIST1H4K; HIST1H4J; HIST1H4C; HIST1H4H; HIST1H4B; HIST1H4L; HIST2H4A; HIST4H4; HIST2H4B		HIST1H4L	2.65
2.71	HIST1H4D; HIST1H4I; HIST1H4A; HIST1H4F; HIST1H4K; HIST1H4J; HIST1H4C; HIST1H4H; HIST1H4B; HIST1H4E; HIST1H4L; HIST2H4A; HIST4H4; HIST2H4B		HIST2H4A	2.71
2.65	HIST1H4E; HIST1H4I; HIST1H4A; HIST1H4D; HIST1H4F; HIST1H4K; HIST1H4J; HIST1H4C; HIST1H4H; HIST1H4B; HIST1H4L; HIST2H4A; HIST4H4; HIST2H4B		HIST2H4B	2.65
2.65	HIST1H4E; HIST1H4I; HIST1H4A; HIST1H4D; HIST1H4F; HIST1H4K; HIST1H4J; HIST1H4C; HIST1H4H; HIST1H4B; HIST1H4L; HIST2H4A; HIST4H4; HIST2H4B		HIST4H4	2.65
7.3	HLA-DQA1		HLA-DQA1	7.3
-5.78	HLA-DRB4		HLA-DRB4	-5.78
2.19	HMGA2		HMGA2	2.19
2.01	HMGB3		HMGB3	2.01
2.49	HSPB6		HSPB6	2.49
2.48	HTR1D		HTR1D	2.48
-2.43	HTR3A		HTR3A	-2.43
-2.18	ID1		ID1	-2.18
2.71	IFI27		IFI27	2.71
2.09	IFI6		IFI6	2.09
2.73	IGF2BP1		IGF2BP1	2.73
-3.6	IGHA1		IGHA1	-3.6
-2.06	IGHG1; ZCWPW2; SKAP2; KIAA0125; LINC00226; LINC00221		IGHG1	-2.06
-2.48	IGHJ1		IGHJ1	-2.48
-3.05	IGHJ5		IGHJ5	-3.05
-4.33	IGHM		IGHM	-4.33
-2.04	IGHV1-18		IGHV1-18	-2.04
-2.23	IGHV1-3		IGHV1-3	-2.23
-2.42	IGHV1-45		IGHV1-45	-2.42
-4.33	IGHV1-8		IGHV1-8	-4.33
-3.58	IGHV2-5		IGHV2-5	-3.58
-2.25	LOC100293211; IGHV3-11		IGHV3-11	-2.25
-4.62	IGHV3-15		IGHV3-15	-4.62
-2.55	IGHV3-21		IGHV3-21	-2.55
-3.22	IGHV3-23		IGHV3-23	-3.22
-3.42	IGHV3-30		IGHV3-30	-3.42
-3.58	EPC1; IGHV3-33		IGHV3-33	-3.58
-2.34	IGHV3-35		IGHV3-35	-2.34
-2.91	IGHV3-38		IGHV3-38	-2.91
-3.02	IGHV3-48		IGHV3-48	-3.02
-3.28	IGHV3-49		IGHV3-49	-3.28
-2.84	IGHV3-53		IGHV3-53	-2.84
-2.09	IGHV3-64		IGHV3-64	-2.09
-2.9	IGHV3-66		IGHV3-66	-2.9
-4.37	IGHV3-7		IGHV3-7	-4.37
-3	IGHV3-72		IGHV3-72	-3
-3.91	IGHV3-73		IGHV3-73	-3.91
-2.32	IGHV3-74		IGHV3-74	-2.32
-4.49	IGHV3-9		IGHV3-9	-4.49
-2.79	IGHV3OR16-10		IGHV3OR16-10	-2.79
-2.24	IGHV3OR16-9		IGHV3OR16-9	-2.24
-4.04	LOC642131; IGHV4-28		IGHV4-28	-4.04
-3.68	IGHV4-31		IGHV4-31	-3.68
-2.93	IGHV4-61		IGHV4-61	-2.93
-2.14	IGHV6-1		IGHV6-1	-2.14
-10.31	IGJ		IGJ	-10.31
-5.52	IGKC		IGKC	-5.52
-2.35	IGKC; IGKJ5; IGKJ4; IGKJ3; IGKJ2; IGKJ1; IGKV3-15; IGKV2-30; IGKV1-33; IGKV1-16; IGKV1-12; IGKV3-20; IGKV1-39; IGK; AC096579.7; AC096579.13		IGKJ1	-2.35
-2.35	IGKC; IGKJ5; IGKJ4; IGKJ3; IGKJ2; IGKJ1; IGKV3-15; IGKV2-30; IGKV1-33; IGKV1-16; IGKV1-12; IGKV3-20; IGKV1-39; IGK; AC096579.7; AC096579.13		IGKJ2	-2.35
-2.35	IGKC; IGKJ5; IGKJ4; IGKJ3; IGKJ2; IGKJ1; IGKV3-15; IGKV2-30; IGKV1-33; IGKV1-16; IGKV1-12; IGKV3-20; IGKV1-39; IGK; AC096579.7; AC096579.13		IGKJ3	-2.35
-2.35	IGKC; IGKJ5; IGKJ4; IGKJ3; IGKJ2; IGKJ1; IGKV3-15; IGKV2-30; IGKV1-33; IGKV1-16; IGKV1-12; IGKV3-20; IGKV1-39; IGK; AC096579.7; AC096579.13		IGKJ4	-2.35
-2.35	IGKC; IGKJ5; IGKJ4; IGKJ3; IGKJ2; IGKJ1; IGKV3-15; IGKV2-30; IGKV1-33; IGKV1-16; IGKV1-12; IGKV3-20; IGKV1-39; IGK; AC096579.7; AC096579.13		IGKJ5	-2.35
-2.7	IGKV@; IGLV2-18		IGKV@	-2.7
-2.35	IGKC; IGKJ5; IGKJ4; IGKJ3; IGKJ2; IGKJ1; IGKV3-15; IGKV2-30; IGKV1-33; IGKV1-16; IGKV1-12; IGKV3-20; IGKV1-39; IGK; AC096579.7; AC096579.13		IGKV1-12	-2.35
-2.35	IGKC; IGKJ5; IGKJ4; IGKJ3; IGKJ2; IGKJ1; IGKV3-15; IGKV2-30; IGKV1-33; IGKV1-16; IGKV1-12; IGKV3-20; IGKV1-39; IGK; AC096579.7; AC096579.13		IGKV1-16	-2.35
-2.71	IGKV1-17		IGKV1-17	-2.71
-3.91	IGKV1-27		IGKV1-27	-3.91
-2.35	IGKC; IGKJ5; IGKJ4; IGKJ3; IGKJ2; IGKJ1; IGKV3-15; IGKV2-30; IGKV1-33; IGKV1-16; IGKV1-12; IGKV3-20; IGKV1-39; IGK; AC096579.7; AC096579.13		IGKV1-33	-2.35
-2.39	IGKV1-37		IGKV1-37	-2.39
-2.35	IGKC; IGKJ5; IGKJ4; IGKJ3; IGKJ2; IGKJ1; IGKV3-15; IGKV2-30; IGKV1-33; IGKV1-16; IGKV1-12; IGKV3-20; IGKV1-39; IGK; AC096579.7; AC096579.13		IGKV1-39	-2.35
-2.76	IGKV1-5		IGKV1-5	-2.76
-3.09	IGKV1-6		IGKV1-6	-3.09
-3.47	IGKV1-8		IGKV1-8	-3.47
-3.17	IGKV1-9		IGKV1-9	-3.17
-2.26	IGKV1D-12		IGKV1D-12	-2.26
-2.95	IGKV1D-16		IGKV1D-16	-2.95
-3.25	IGKV1D-27		IGKV1D-27	-3.25
-2.02	IGKV1D-33		IGKV1D-33	-2.02
-2.92	IGKV1D-37		IGKV1D-37	-2.92
-2.29	IGKV1D-39		IGKV1D-39	-2.29
-2.29	IGKV1D-42		IGKV1D-42	-2.29
-3.2	IGKV2-24		IGKV2-24	-3.2
-6.06	IGKV2-28		IGKV2-28	-6.06
-6.09	IGKV2-29		IGKV2-29	-6.09
-2.35	IGKC; IGKJ5; IGKJ4; IGKJ3; IGKJ2; IGKJ1; IGKV3-15; IGKV2-30; IGKV1-33; IGKV1-16; IGKV1-12; IGKV3-20; IGKV1-39; IGK; AC096579.7; AC096579.13		IGKV2-30	-2.35
-3.46	IGKV2D-24		IGKV2D-24	-3.46
-4.91	IGKV2D-26		IGKV2D-26	-4.91
-6.32	IGKV2D-28		IGKV2D-28	-6.32
-6.34	IGKV2D-29		IGKV2D-29	-6.34
-3.13	IGKV3-11		IGKV3-11	-3.13
-2.35	IGKC; IGKJ5; IGKJ4; IGKJ3; IGKJ2; IGKJ1; IGKV3-15; IGKV2-30; IGKV1-33; IGKV1-16; IGKV1-12; IGKV3-20; IGKV1-39; IGK; AC096579.7; AC096579.13		IGKV3-15	-2.35
-2.35	IGKC; IGKJ5; IGKJ4; IGKJ3; IGKJ2; IGKJ1; IGKV3-15; IGKV2-30; IGKV1-33; IGKV1-16; IGKV1-12; IGKV3-20; IGKV1-39; IGK; AC096579.7; AC096579.13		IGKV3-20	-2.35
-2.62	IGKV3-7		IGKV3-7	-2.62
-2.38	IGKV3D-11		IGKV3D-11	-2.38
-3.32	IGKV3D-15		IGKV3D-15	-3.32
-2.7	IGKV3D-20		IGKV3D-20	-2.7
-3.55	IGKV3D-7		IGKV3D-7	-3.55
-2.99	IGKV4-1		IGKV4-1	-2.99
-2.34	IGLC7		IGLC7	-2.34
-2.7	IGKV@; IGLV2-18		IGLV2-18	-2.7
-2.16	IGLV2-33		IGLV2-33	-2.16
-2.6	IGLV3-1		IGLV3-1	-2.6
-2.68	IGLV3-25		IGLV3-25	-2.68
-4.25	IGLV3-27		IGLV3-27	-4.25
-7.93	IGLV7-43		IGLV7-43	-7.93
-7.89	IGLV7-46		IGLV7-46	-7.89
2.07	IL17RB		IL17RB	2.07
-3.23	IL1B		IL1B	-3.23
2.3	ISM1; C20orf82		ISM1	2.3
-2.11	ITGB8		ITGB8	-2.11
-2.13	KCNA3		KCNA3	-2.13
2.26	KCNQ5-AS2; RP3-485C17.2		KCNQ5-AS2	2.26
2.58	KCNQ5-IT1		KCNQ5-IT1	2.58
2.13	KDELC2		KDELC2	2.13
-2.06	IGHG1; ZCWPW2; SKAP2; KIAA0125; LINC00226; LINC00221		KIAA0125	-2.06
-2.19	KIAA1244		KIAA1244	-2.19
-2.77	KIAA1551		KIAA1551	-2.77
-2.08	KRT6A		KRT6A	-2.08
-2.6	KRT7		KRT7	-2.6
-3.92	LCN2		LCN2	-3.92
2.3	LGALS1		LGALS1	2.3
-2.69	LIF		LIF	-2.69
-2.06	IGHG1; ZCWPW2; SKAP2; KIAA0125; LINC00226; LINC00221		LINC00221	-2.06
-2.06	IGHG1; ZCWPW2; SKAP2; KIAA0125; LINC00226; LINC00221		LINC00226	-2.06
-4.02	LINC00342		LINC00342	-4.02
-3.19	LINC00350		LINC00350	-3.19
-2.55	LIPH		LIPH	-2.55
-2.03	LOC100093631		LOC100093631	-2.03
-2.09	LOC100133920		LOC100133920	-2.09
2.34	LOC389834; LOC100233156		LOC100233156	2.34
-2.53	REXO1L1; REXO1L2P; LOC100288562; LOC101929601; LOC101929627		LOC100288562	-2.53
-2.25	LOC100293211; IGHV3-11		LOC100293211	-2.25
-3.42	LOC100506123; LOC100506076; AC159540.1		LOC100506076	-3.42
-3.42	LOC100506123; LOC100506076; AC159540.1		LOC100506123	-3.42
-2.2	LOC100133920; LOC286297; LOC100996643; LOC101928195; LOC101929583; RP11-381O7.3		LOC100996643	-2.2
-3.99	ANKRD36C; LOC100996862		LOC100996862	-3.99
-2.2	LOC100133920; LOC286297; LOC100996643; LOC101928195; LOC101929583; RP11-381O7.3		LOC286297	-2.2
2.34	LOC389834; LOC100233156		LOC389834	2.34
-4.04	LOC642131; IGHV4-28		LOC642131	-4.04
2.41	LRRC15		LRRC15	2.41
-2.01	LY75		LY75	-2.01
-2.21	MACC1		MACC1	-2.21
2.12	MAFIP; TEKT4P2		MAFIP	2.12
-3.94	MAP1B		MAP1B	-3.94
2.02	MARVELD1		MARVELD1	2.02
2.18	MBIP		MBIP	2.18
-2.2	MBOAT2		MBOAT2	-2.2
2.05	MCAM; MIR6756		MCAM	2.05
-3.44	MGP		MGP	-3.44
2.13	MIR26B		MIR26B	2.13
2.07	MIR3689F		MIR3689F	2.07
-2.07	MIR4257		MIR4257	-2.07
-2.24	MIR4635		MIR4635	-2.24
2.65	MKI67		MKI67	2.65
6.19	MMP1		MMP1	6.19
2.87	MMP12		MMP12	2.87
7.28	MMP13		MMP13	7.28
2.07	MMP14		MMP14	2.07
-2.05	MMP7		MMP7	-2.05
3.18	MMP9		MMP9	3.18
7.64	MT1A		MT1A	7.64
3.14	MT1E		MT1E	3.14
2.19	MT1F		MT1F	2.19
3.34	MT1G		MT1G	3.34
2.64	MT1H		MT1H	2.64
2.71	MT1JP		MT1JP	2.71
6.71	MT1L		MT1L	6.71
3.02	MT1M		MT1M	3.02
2.97	MUC16		MUC16	2.97
-2.59	MUC20		MUC20	-2.59
-2.02	MUC21; C6orf205		MUC21	-2.02
2.5	MUC4		MUC4	2.5
-3.56	MUC5B		MUC5B	-3.56
3.34	MX1		MX1	3.34
2.29	MYBPH		MYBPH	2.29
-2.26	NAIP		NAIP	-2.26
2.1	NETO2		NETO2	2.1
2.05	NID1		NID1	2.05
3.07	NRK		NRK	3.07
2.07	NT5E		NT5E	2.07
2.27	OAS2		OAS2	2.27
2.17	PDE4A		PDE4A	2.17
-2.39	PELI2		PELI2	-2.39
-2.31	PGAM2		PGAM2	-2.31
-2.09	PGC		PGC	-2.09
2.55	PHC2		PHC2	2.55
-5.15	PIGR		PIGR	-5.15
-2.33	PLA2G1B		PLA2G1B	-2.33
-3.92	PLA2G4A		PLA2G4A	-3.92
-8.96	PLAT		PLAT	-8.96
-4.26	POF1B		POF1B	-4.26
2.08	PON3		PON3	2.08
-2.15	POPDC3		POPDC3	-2.15
2.42	PPBP		PPBP	2.42
-2.25	PPM1H		PPM1H	-2.25
2.56	PPP1R14BP3		PPP1R14BP3	2.56
-2.4	PRKAR1A		PRKAR1A	-2.4
-2.56	PRLR		PRLR	-2.56
-2.08	PRSS12		PRSS12	-2.08
-2.75	PRSS8		PRSS8	-2.75
-9.02	PTGS2		PTGS2	-9.02
-2.02	RASEF		RASEF	-2.02
-2.76	RDH10		RDH10	-2.76
-2.53	REXO1L1; REXO1L2P; LOC100288562; LOC101929601; LOC101929627		REXO1L1	-2.53
-2.4	REXO1L1; REXO1L2P; LOC100288562; LOC101929601; LOC101929627; REXO1L1P		REXO1L2P	-2.4
2.32	DUSP5P1; RHOU		RHOU	2.32
-2.03	RNU5D-1		RNU5D-1	-2.03
-2.12	RNU7-11P		RNU7-11P	-2.12
2.77	RPS4Y1; AC006157.2		RPS4Y1	2.77
2.75	RUNX1-IT1		RUNX1-IT1	2.75
2.37	S100A4		S100A4	2.37
-11.77	S100A9		S100A9	-11.77
-3.45	SAMD12		SAMD12	-3.45
-2.27	SBK1		SBK1	-2.27
-2.08	SCARNA4		SCARNA4	-2.08
2.01	SCARNA6		SCARNA6	2.01
-2.03	IGHG1; IGK; SKAP2; ADAM6; IGHM; IGHV3-48; EPC1; SCFV		SCFV	-2.03
-2.93	SCGB3A2		SCGB3A2	-2.93
-2.67	SEC61G		SEC61G	-2.67
-2.87	SEL1L3		SEL1L3	-2.87
-3.18	SELL		SELL	-3.18
2.07	SEMA3A		SEMA3A	2.07
2.13	SFTPA1		SFTPA1	2.13
2.51	SFTPA2		SFTPA2	2.51
-2.06	IGHG1; ZCWPW2; SKAP2; KIAA0125; LINC00226; LINC00221		SKAP2	-2.06
-2.59	SLC12A7		SLC12A7	-2.59
-4.42	SLC34A2		SLC34A2	-4.42
-2.08	SLCO4A1		SLCO4A1	-2.08
-2.9	SLPI		SLPI	-2.9
2.06	SNCG		SNCG	2.06
-2.02	SNORA23		SNORA23	-2.02
-3.14	SNORD115-5; SNORD115-9; SNORD115-10; SNORD115-12		SNORD115-10	-3.14
-3.14	SNORD115-11; SNORD115-29; SNORD115-36; SNORD115-43		SNORD115-11	-3.14
-3.14	SNORD115-5; SNORD115-9; SNORD115-10; SNORD115-12		SNORD115-12	-3.14
-3	SNORD115-22		SNORD115-22	-3
-3.14	SNORD115-11; SNORD115-29; SNORD115-36; SNORD115-43		SNORD115-29	-3.14
-3.14	SNORD115-11; SNORD115-29; SNORD115-36; SNORD115-43		SNORD115-36	-3.14
-3.14	SNORD115-11; SNORD115-29; SNORD115-36; SNORD115-43		SNORD115-43	-3.14
-2.19	SNORD115-44		SNORD115-44	-2.19
-3.14	SNORD115-5; SNORD115-9; SNORD115-10; SNORD115-12		SNORD115-5	-3.14
-3.14	SNORD115-5; SNORD115-9; SNORD115-10; SNORD115-12		SNORD115-9	-3.14
-2.06	SNORD116-15		SNORD116-15	-2.06
-2.08	SNORD119		SNORD119	-2.08
6.39	SNORD14D		SNORD14D	6.39
-2.29	SNORD1B		SNORD1B	-2.29
-2.02	SNORD61		SNORD61	-2.02
-2.71	SNORD63		SNORD63	-2.71
-2.92	SNORD75		SNORD75	-2.92
-2.18	SNORD85		SNORD85	-2.18
-2.01	SNORD9		SNORD9	-2.01
-3.61	SOX2		SOX2	-3.61
-9.13	SPINK1		SPINK1	-9.13
-2.79	SPINT2		SPINT2	-2.79
2.23	SPRR1B		SPRR1B	2.23
3.19	SPRR2D		SPRR2D	3.19
3.27	SPTB		SPTB	3.27
-2.46	SRD5A3		SRD5A3	-2.46
-3.08	ST6GALNAC1		ST6GALNAC1	-3.08
-2.16	SUMF2		SUMF2	-2.16
2.05	SYT7		SYT7	2.05
2.5	TBX3		TBX3	2.5
2.39	TCEA3		TCEA3	2.39
-2.02	TCN1		TCN1	-2.02
2.26	TDRD12		TDRD12	2.26
2.12	MAFIP; TEKT4P2		TEKT4P2	2.12
2.19	THY1		THY1	2.19
2.62	TIMP3		TIMP3	2.62
-3.63	TMC5; RNU4-46P		TMC5	-3.63
-2.07	TMEM245		TMEM245	-2.07
2.6	TMPRSS11E		TMPRSS11E	2.6
-2.36	TMPRSS4		TMPRSS4	-2.36
2.1	TNC		TNC	2.1
-3.7	TNFAIP3		TNFAIP3	-3.7
-2.7	TP53INP1		TP53INP1	-2.7
-2.44	TRIM44		TRIM44	-2.44
2.65	TRNP1		TRNP1	2.65
-2.72	TSPAN1		TSPAN1	-2.72
-2.51	TSPAN13		TSPAN13	-2.51
-2.11	TSPAN3		TSPAN3	-2.11
-2.25	TXN		TXN	-2.25
3.35	UBE2C		UBE2C	3.35
3.45	VGF		VGF	3.45
-3.04	VOPP1; LOC101060281		VOPP1	-3.04
2.44	VSIG1		VSIG1	2.44
-2.55	VTRNA1-2		VTRNA1-2	-2.55
-3.46	VTRNA2-1		VTRNA2-1	-3.46
4.06	XAGE1A; XAGE1B; XAGE1C; XAGE1E; XAGE1D		XAGE1A	4.06
3.71	XAGE1A; XAGE1B; XAGE1D; XAGE1E; XAGE1C		XAGE1B	3.71
4.06	XAGE1A; XAGE1B; XAGE1C; XAGE1E; XAGE1D		XAGE1C	4.06
3.71	XAGE1A; XAGE1B; XAGE1D; XAGE1E; XAGE1C		XAGE1D	3.71
13.96	XAGE1E		XAGE1E	13.96
-30.4	XIST		XIST	-30.4
-2.06	IGHG1; ZCWPW2; SKAP2; KIAA0125; LINC00226; LINC00221		ZCWPW2	-2.06
